# Supplementary material for: Socioeconomic and Governance Factors Disentangle the Relationship between Temperature and Antimicrobial Resistance: A 10-Year Ecological Analysis of European Countries
Source: MDPI journal article supplement (doi:10.3390/antibiotics12040777), 2023-04-19
Supplement: s1 [file s1]

**Figure S1.** Trends in AMR (%) for *E. coli*, *K. pneumoniae*, and *S. aureus* between 2000-2019 across 30 European countries. Antibiotic classes are represented by coloured lines.

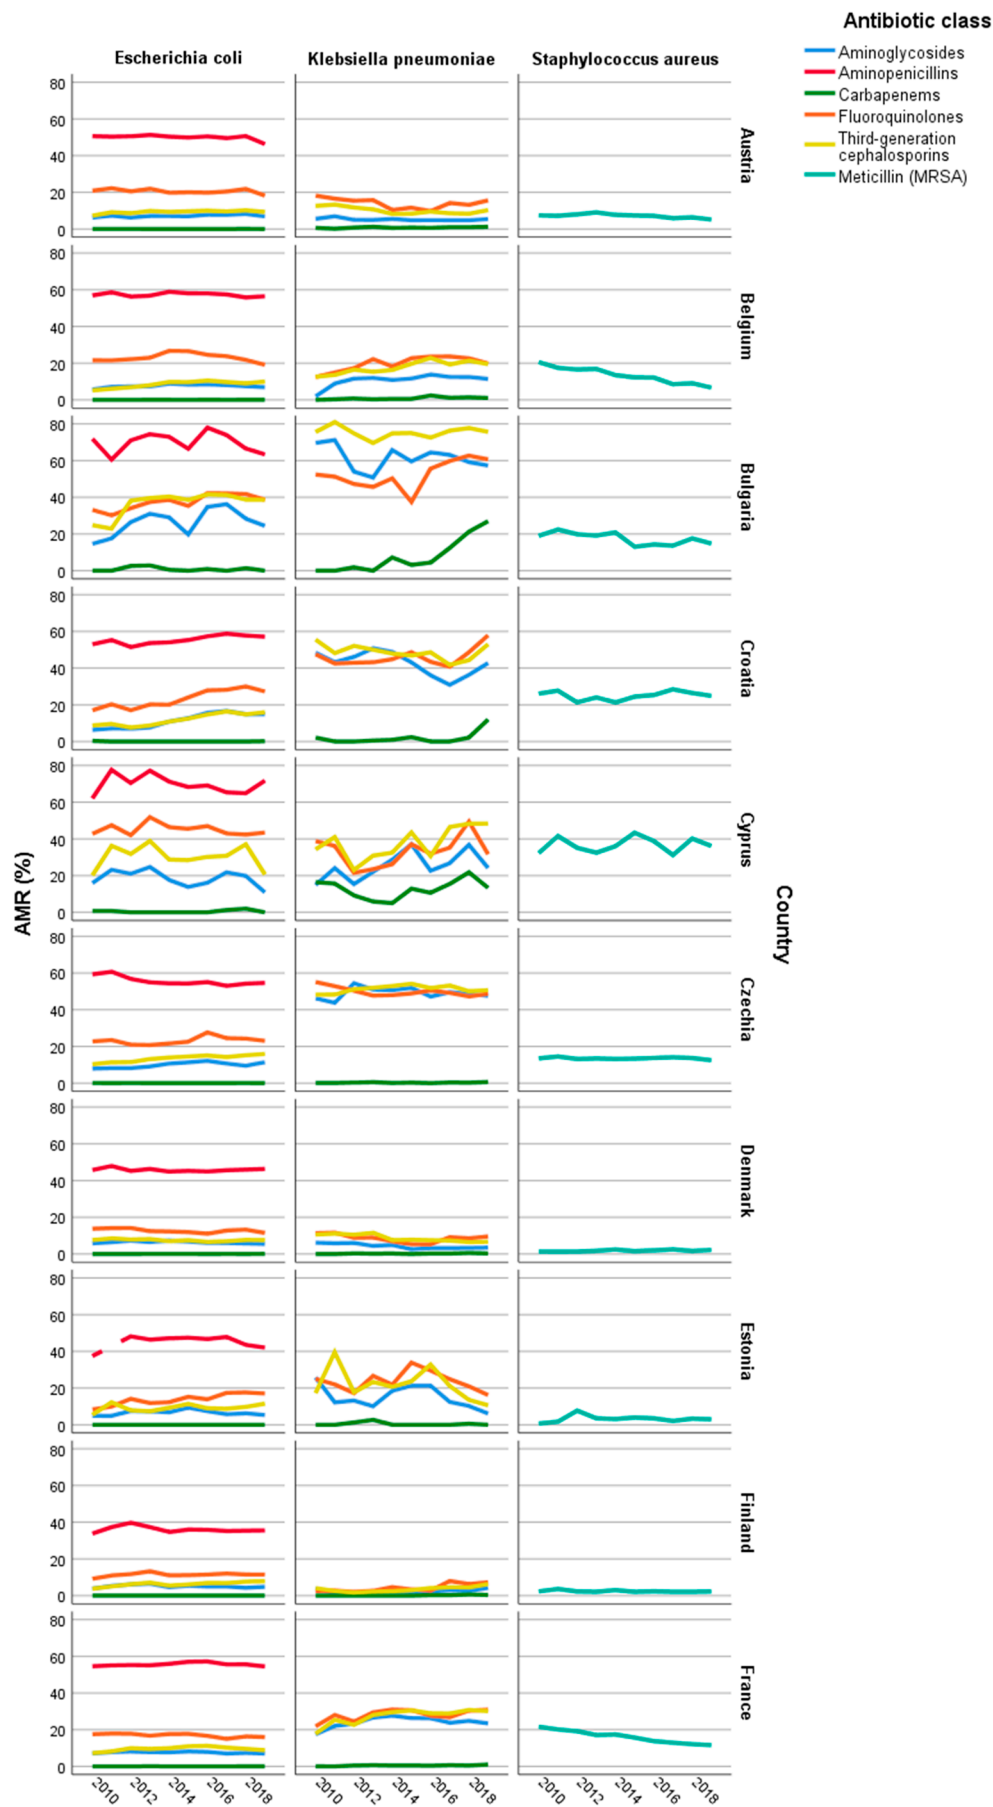

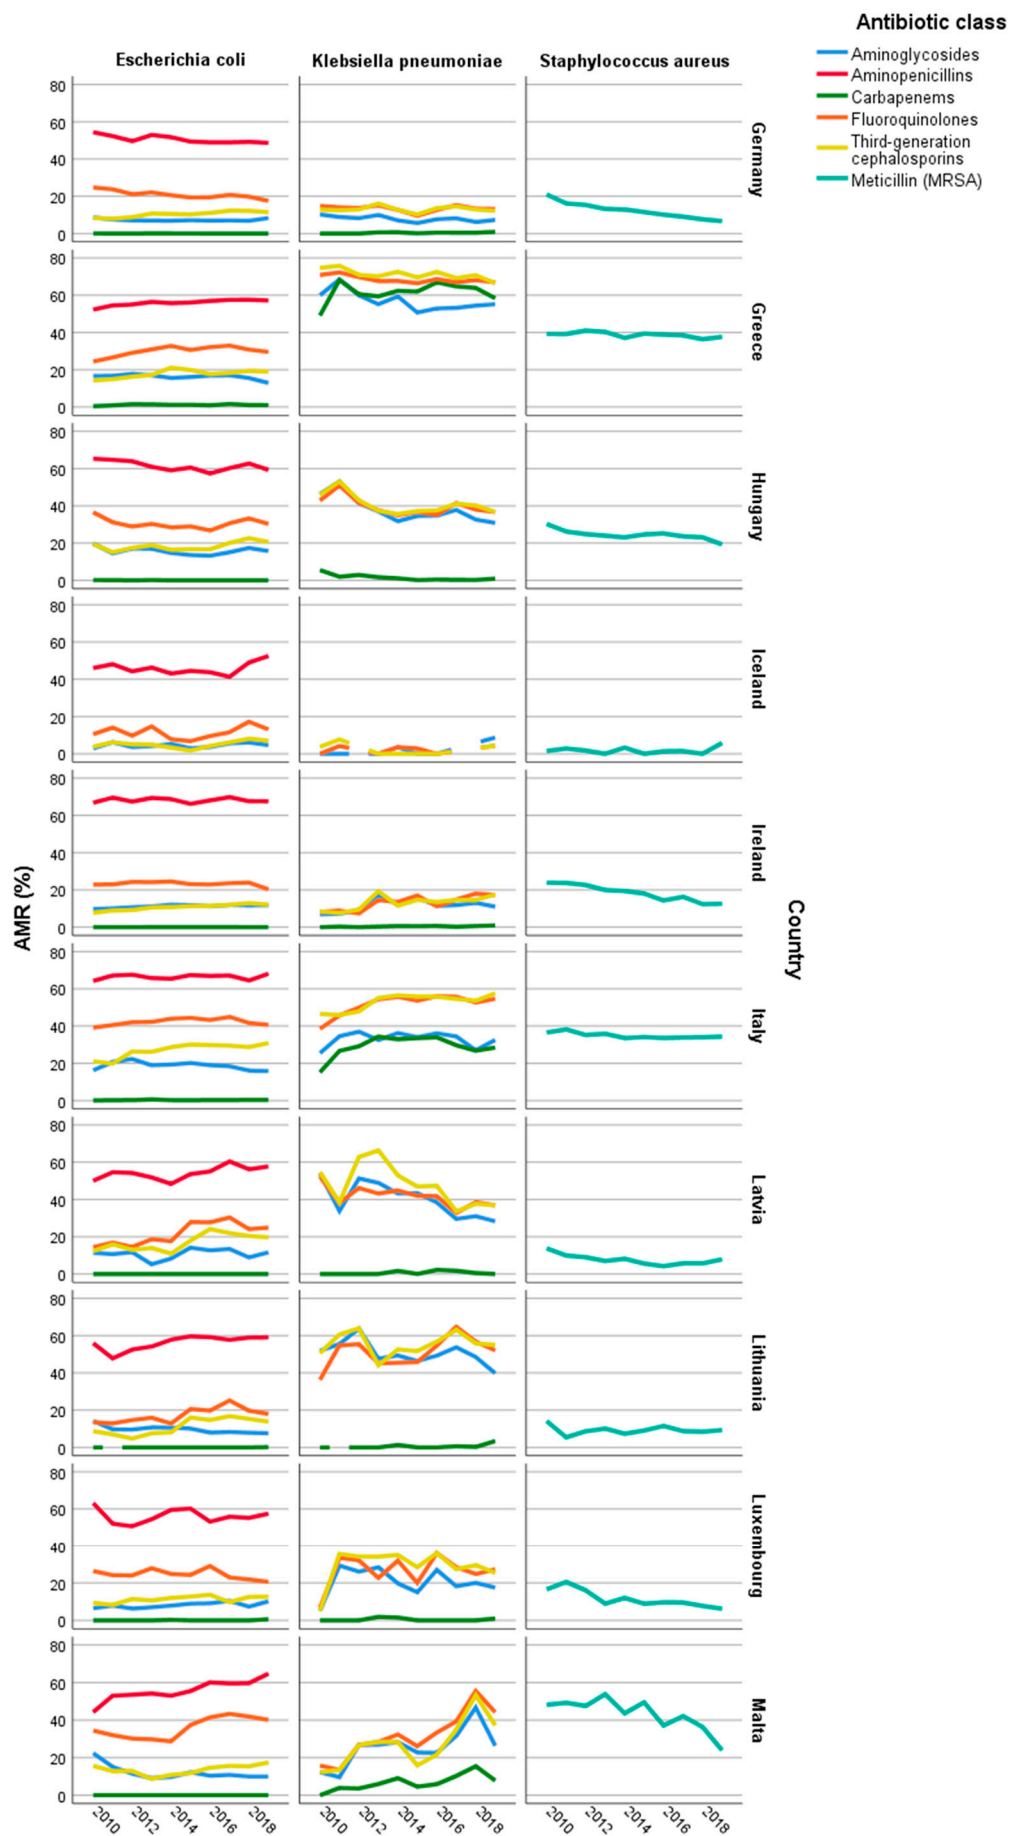

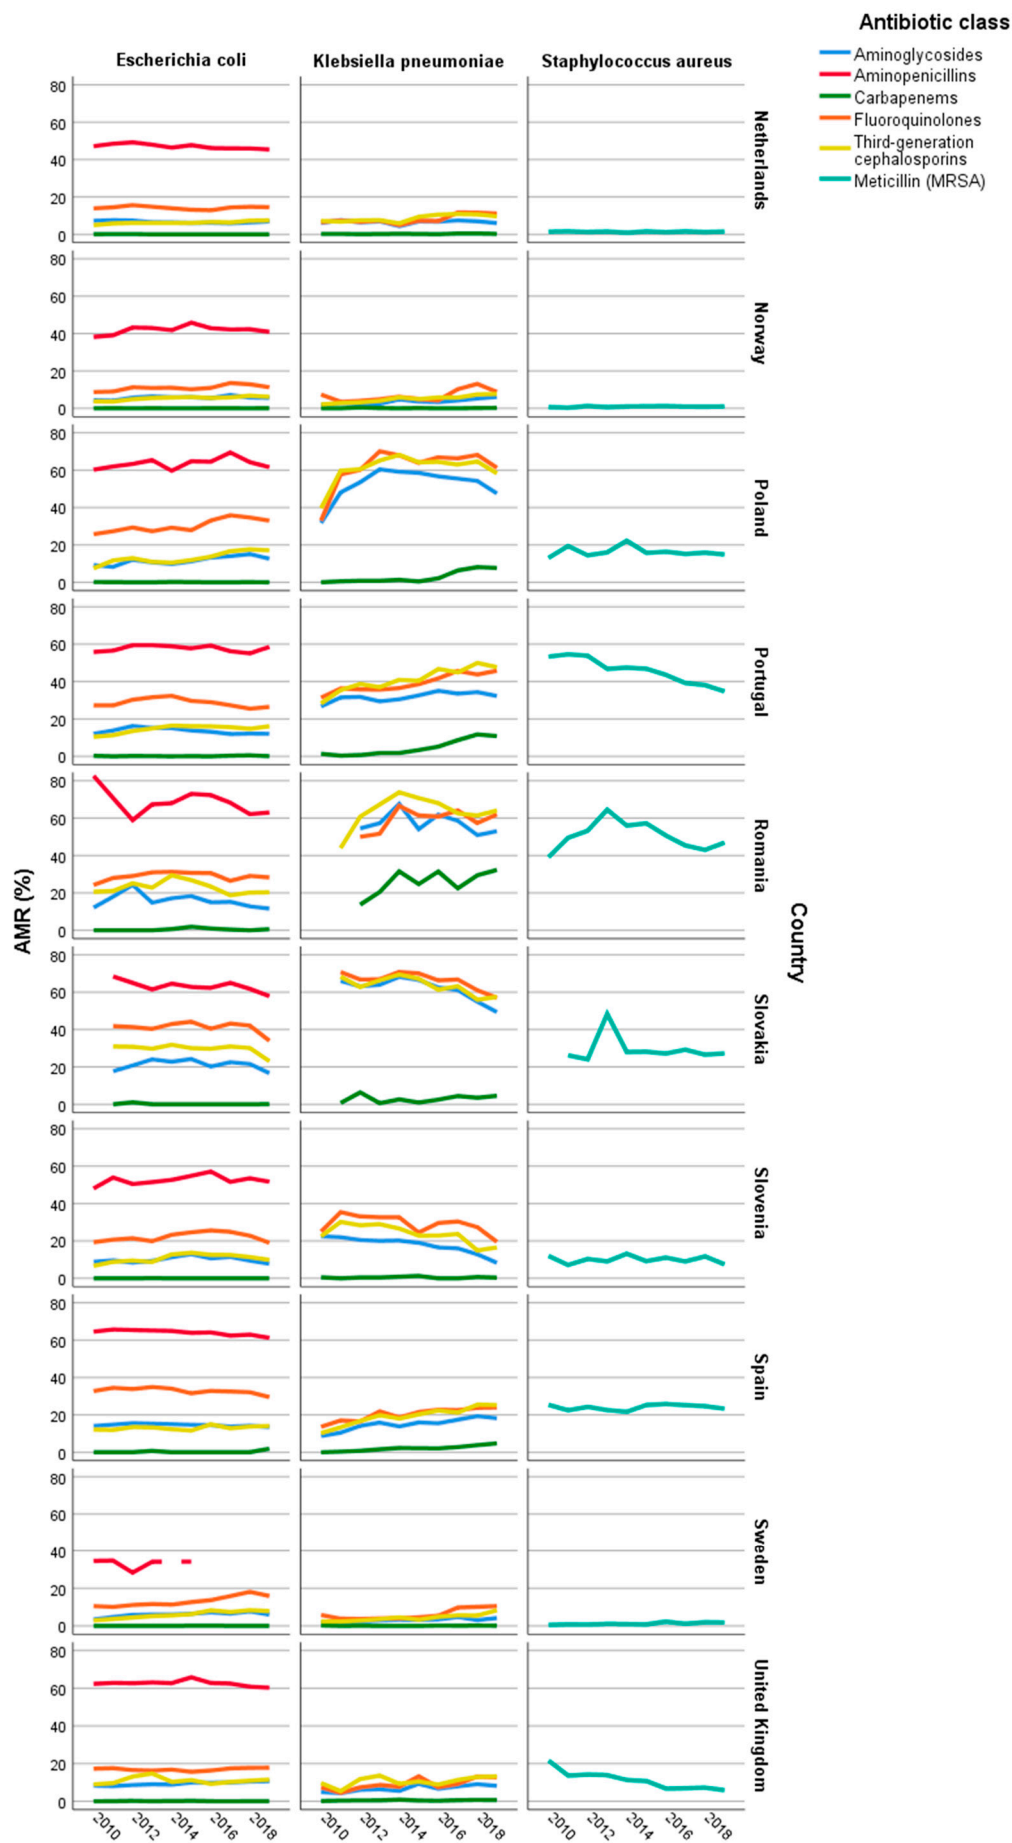

**Figure S2.** Trends in annual temperature change between 2010-2019 across 30 European countries.

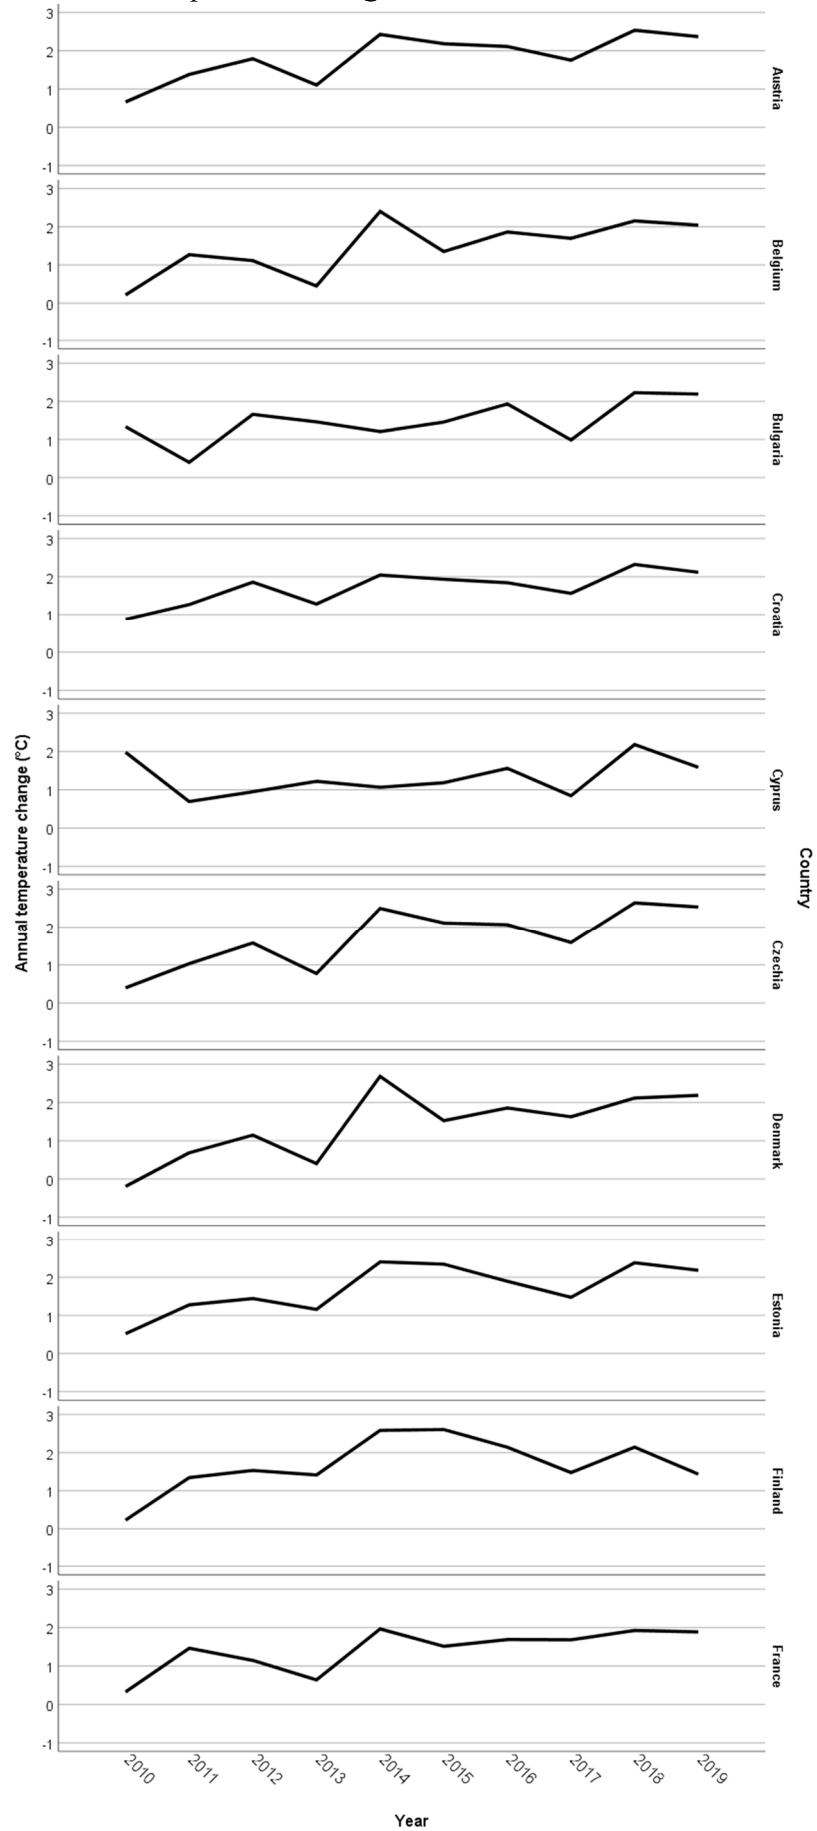

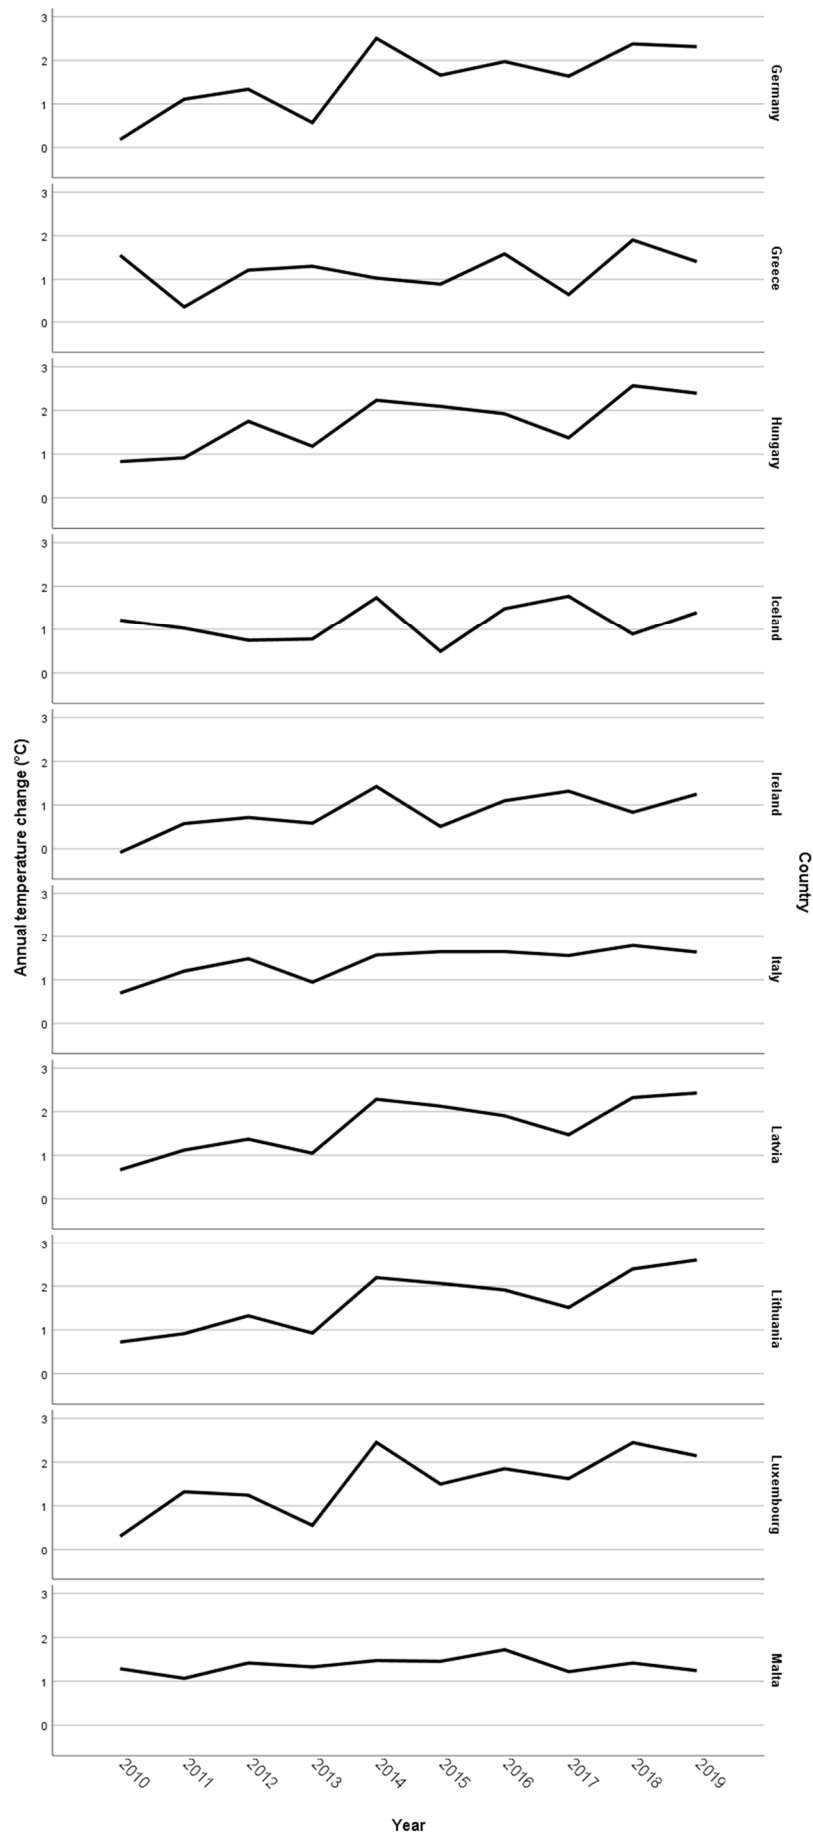

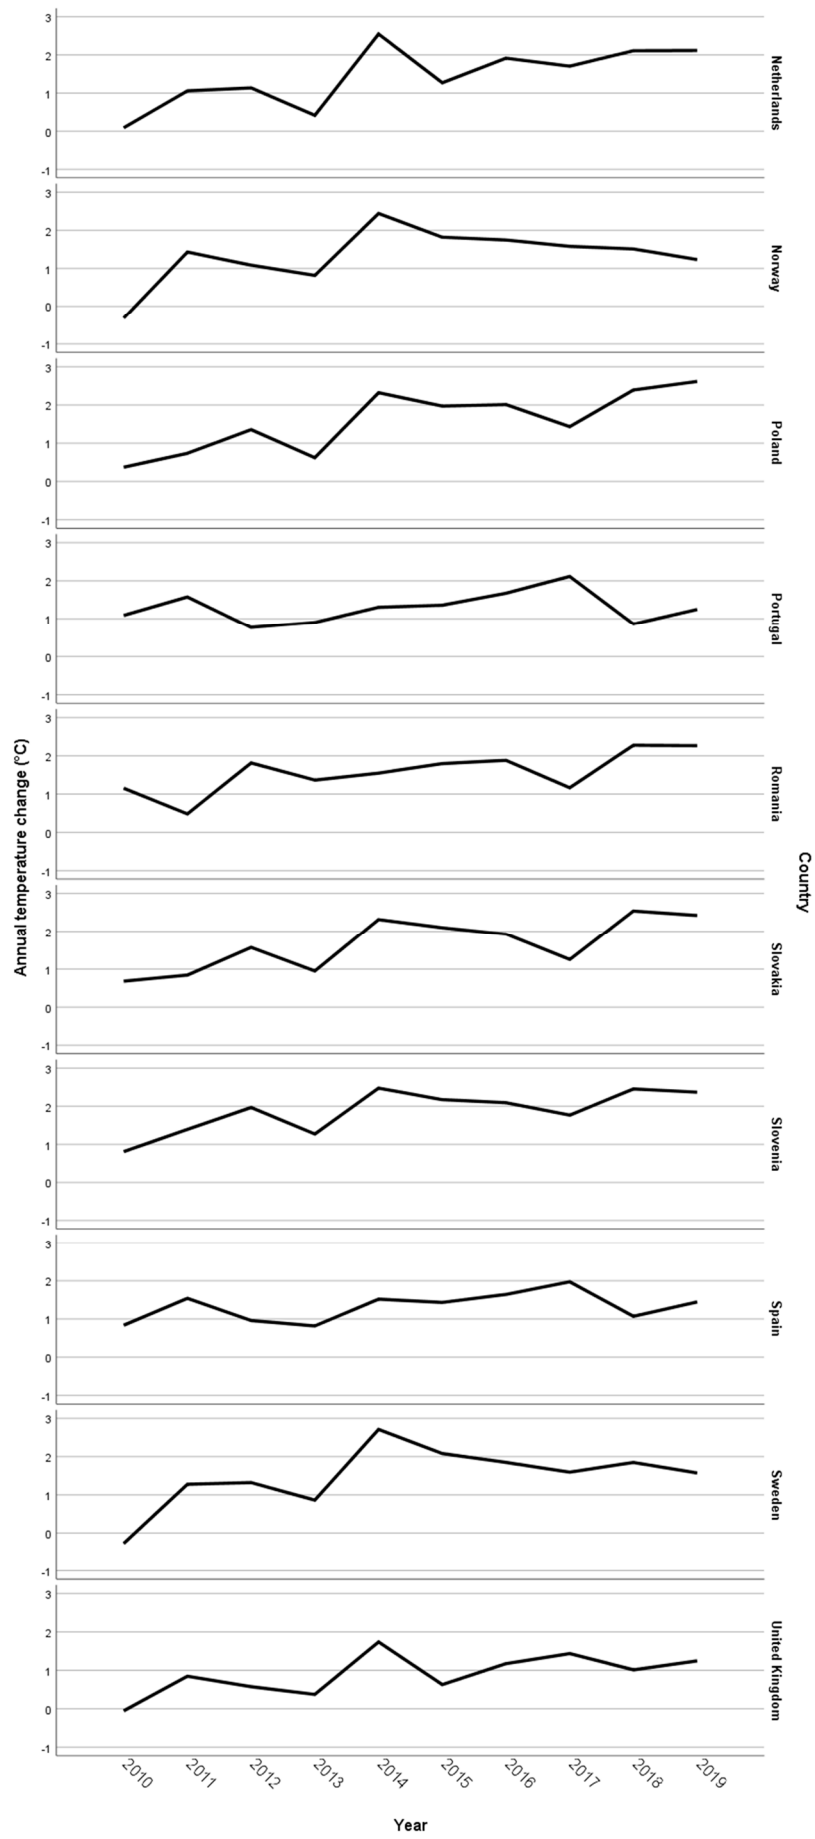

**Figure S3.** Association of annual temperature change with population density (A), GDP per capita (B), and the governance index (C). Unadjusted weighted linear trend lines are shown.

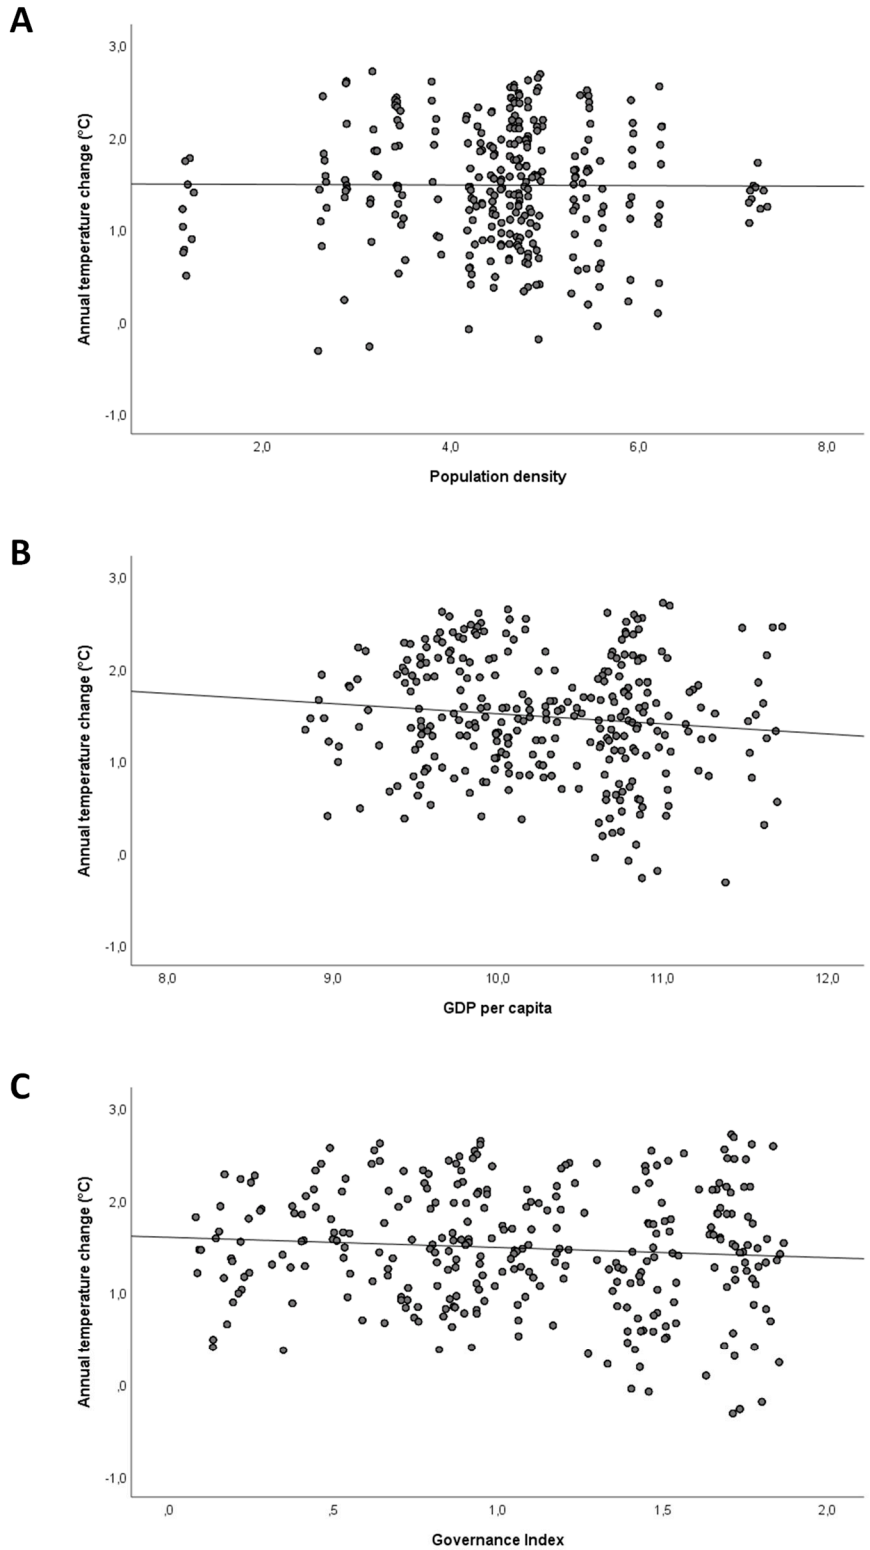

**Figure S4.** Trends in antibiotic consumption between 2010-2019 across 30 European countries.

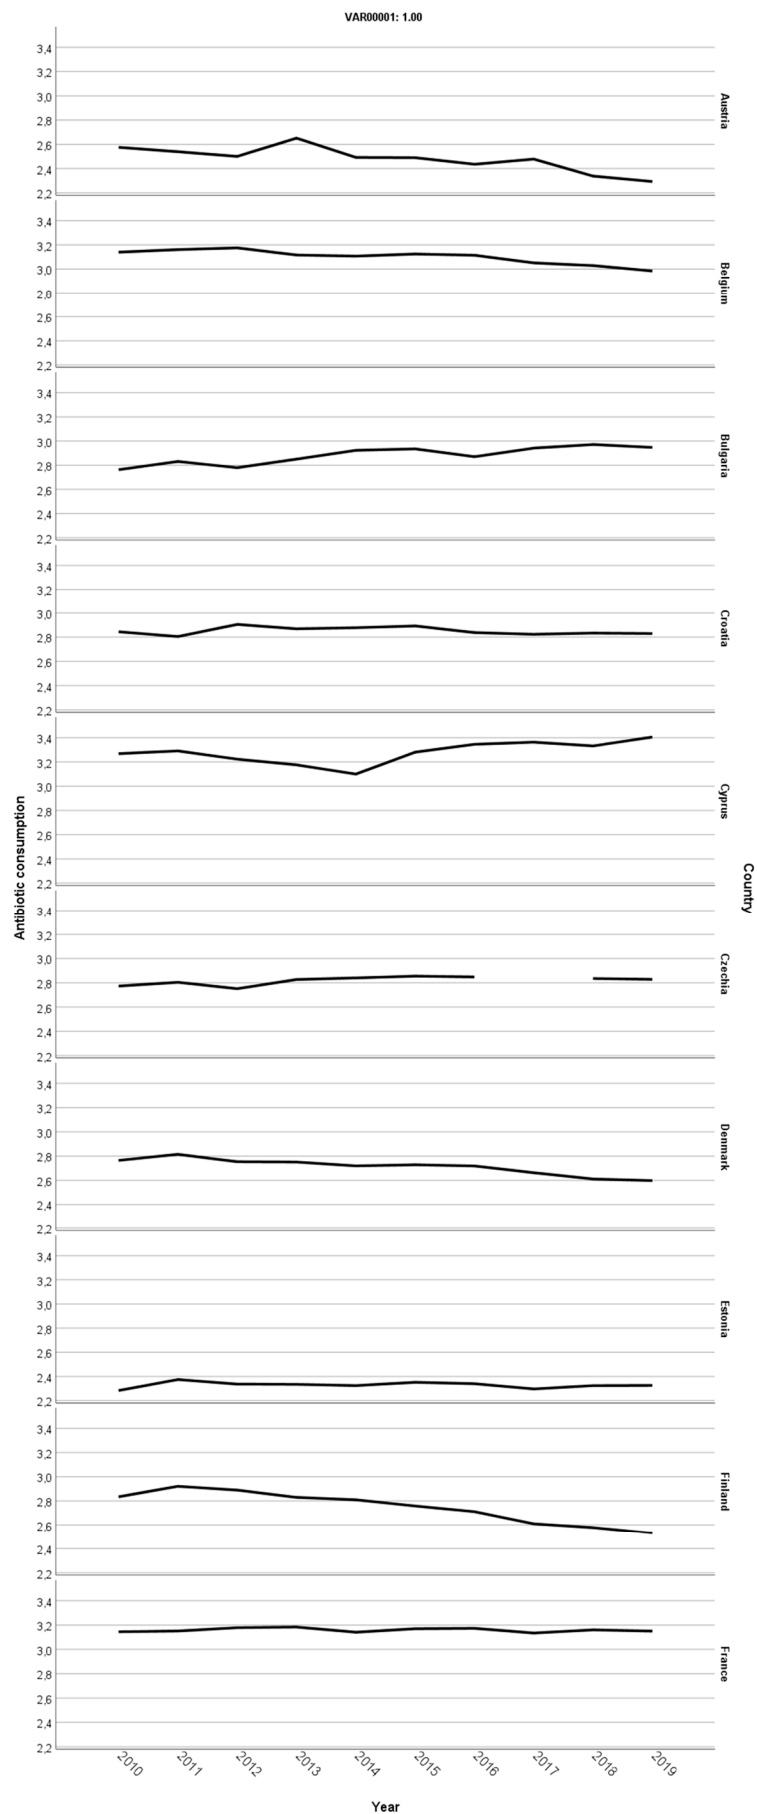

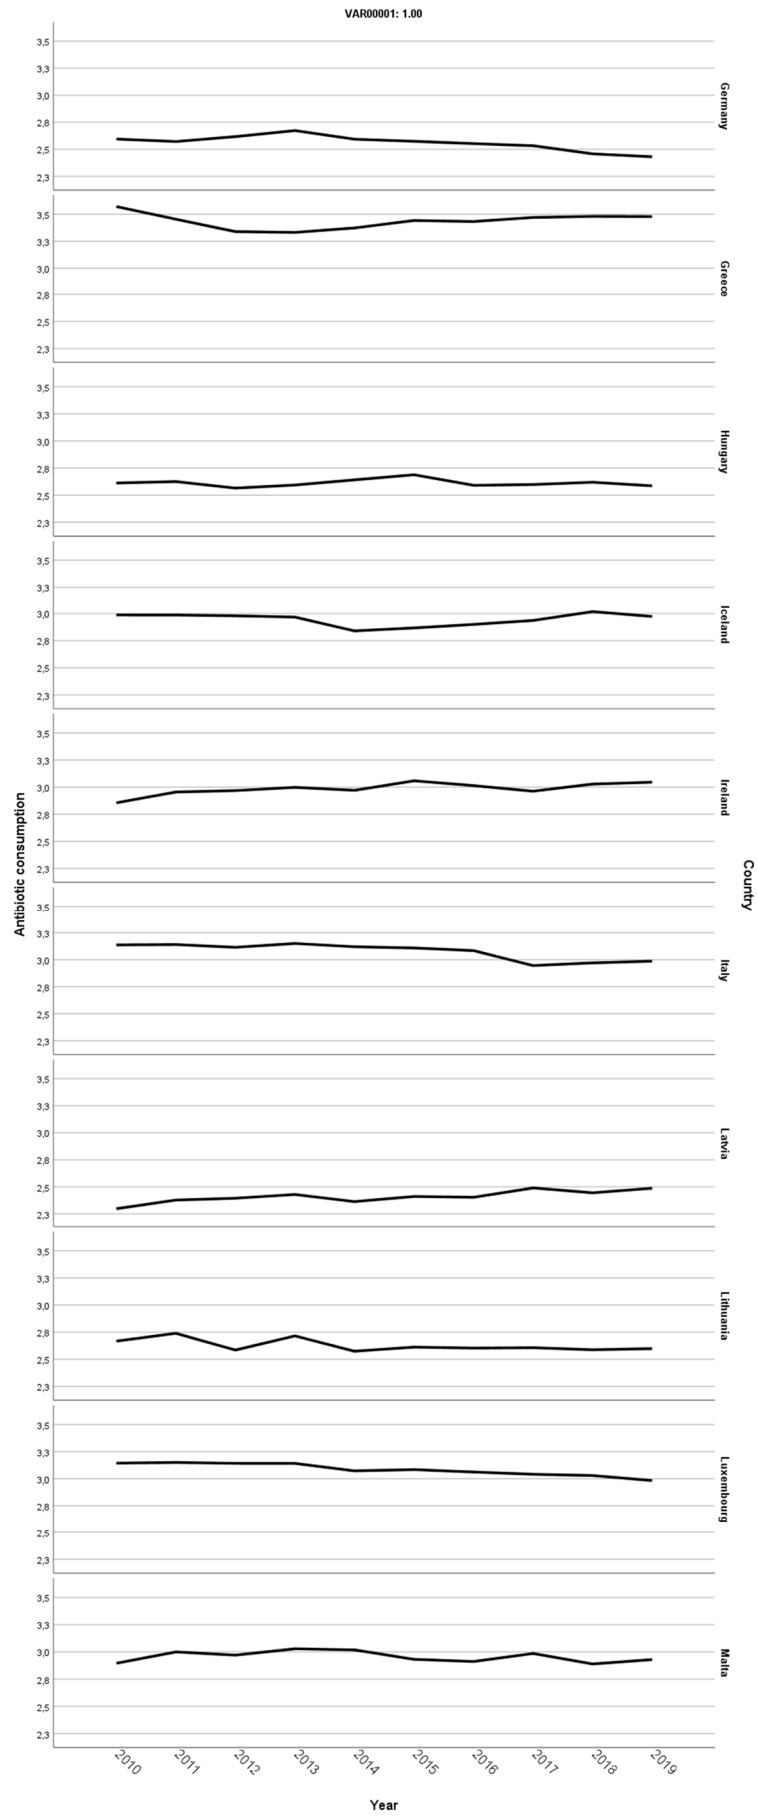

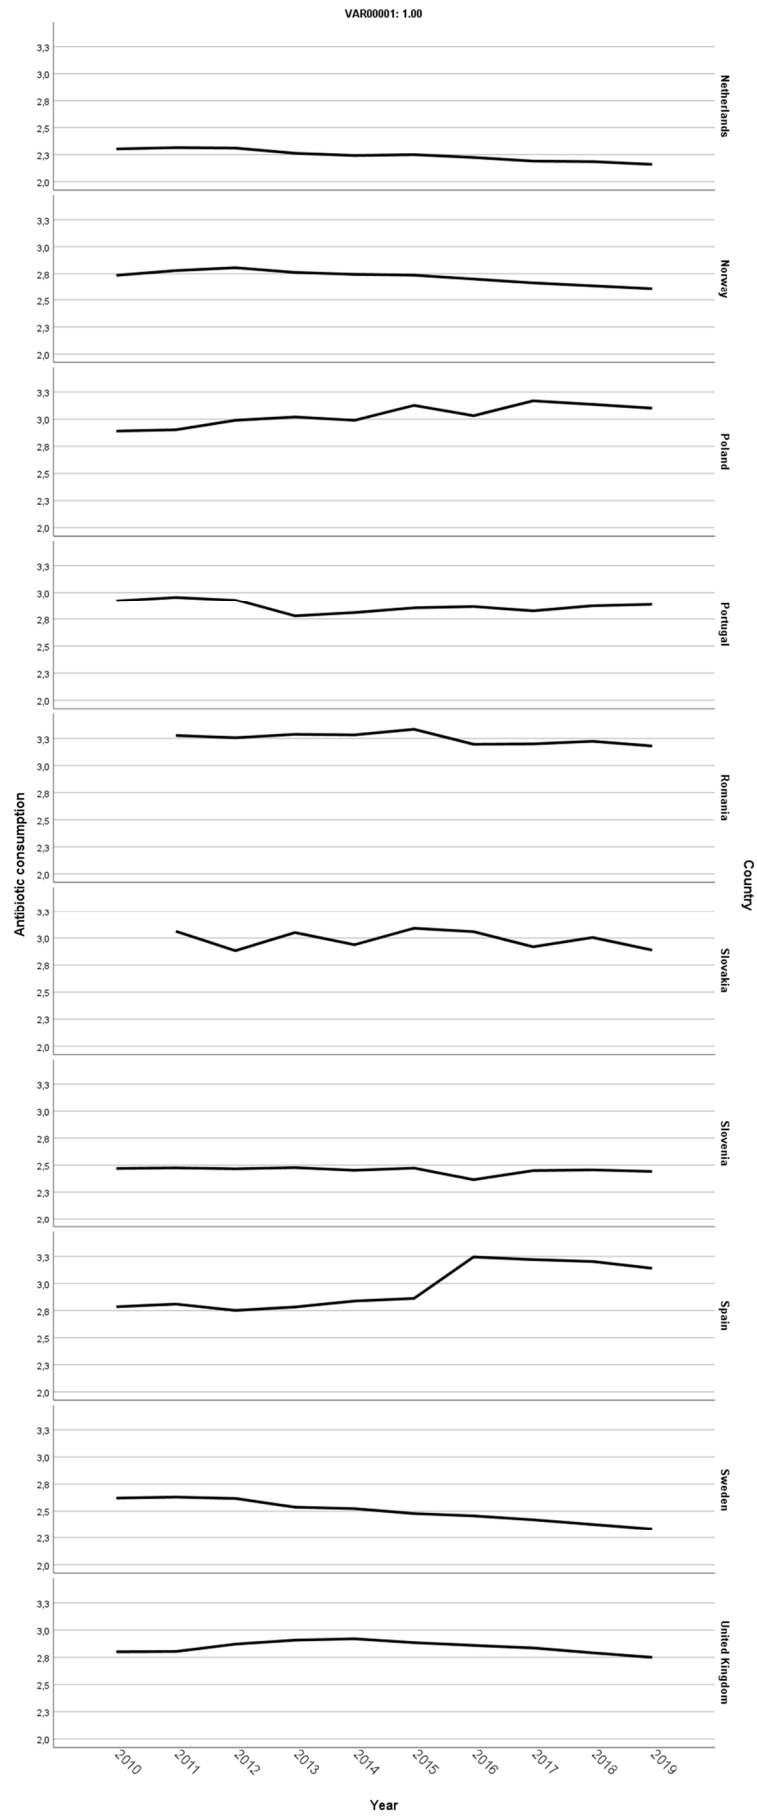

**Figure S5.** Trends in population density between 2010-2019 across 30 European countries.

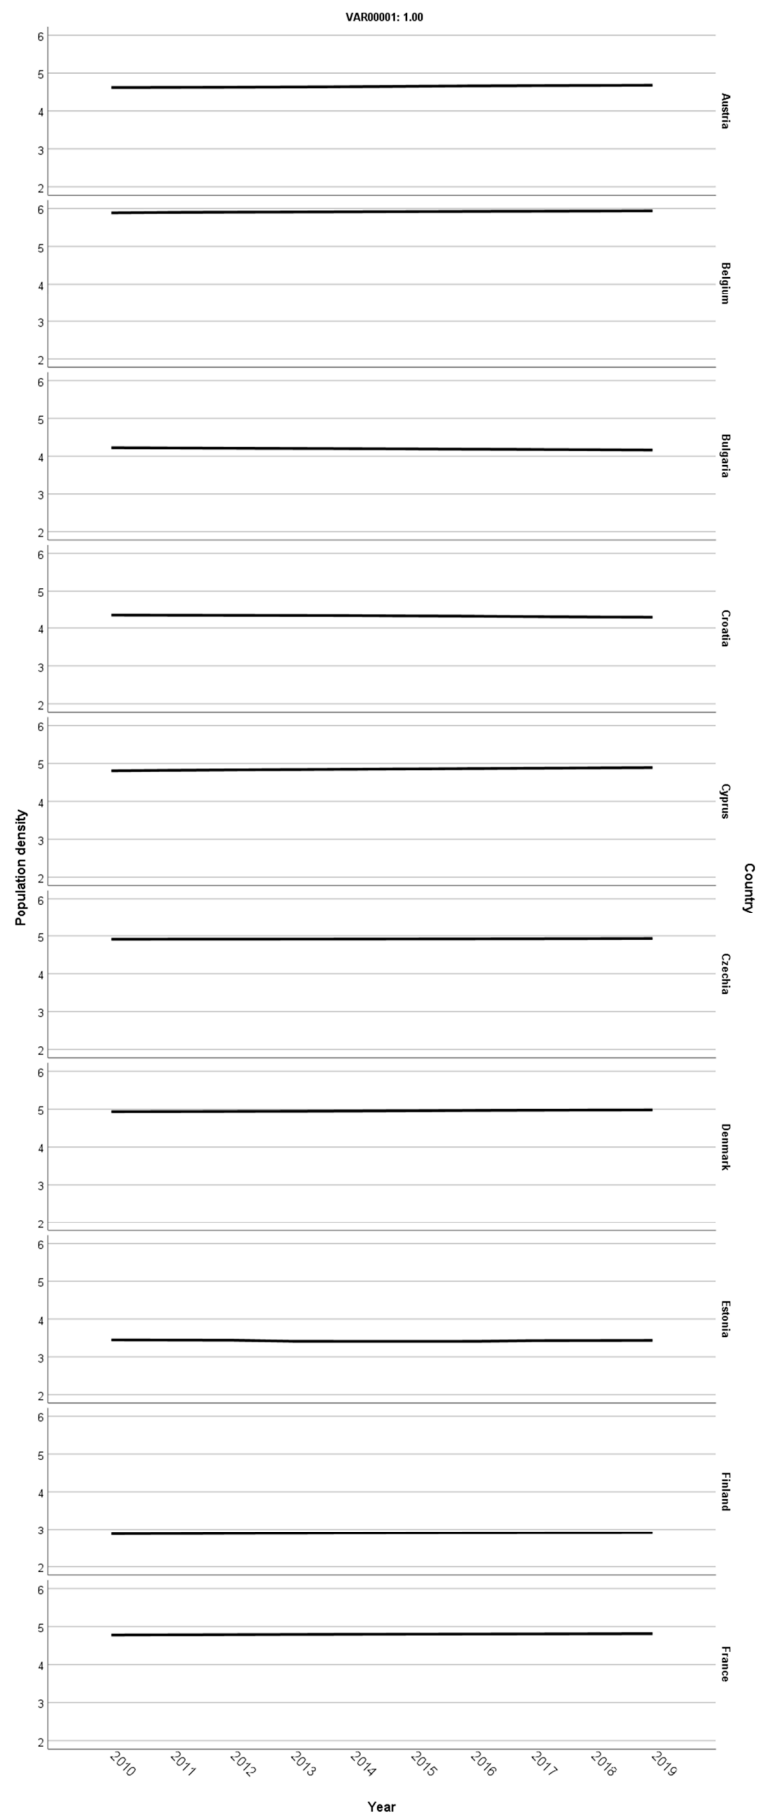

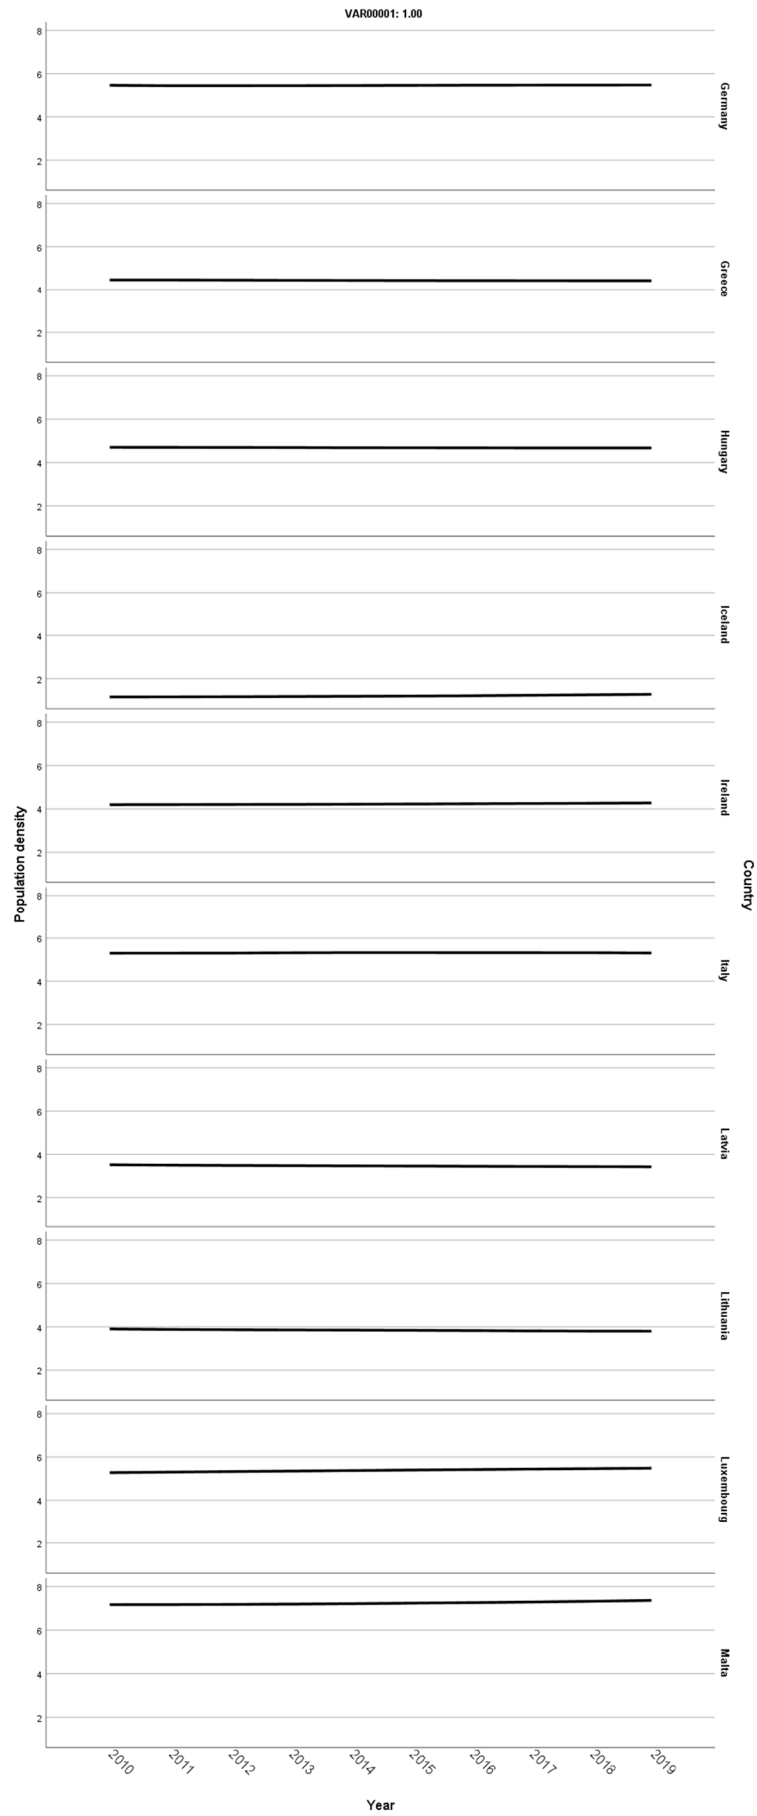

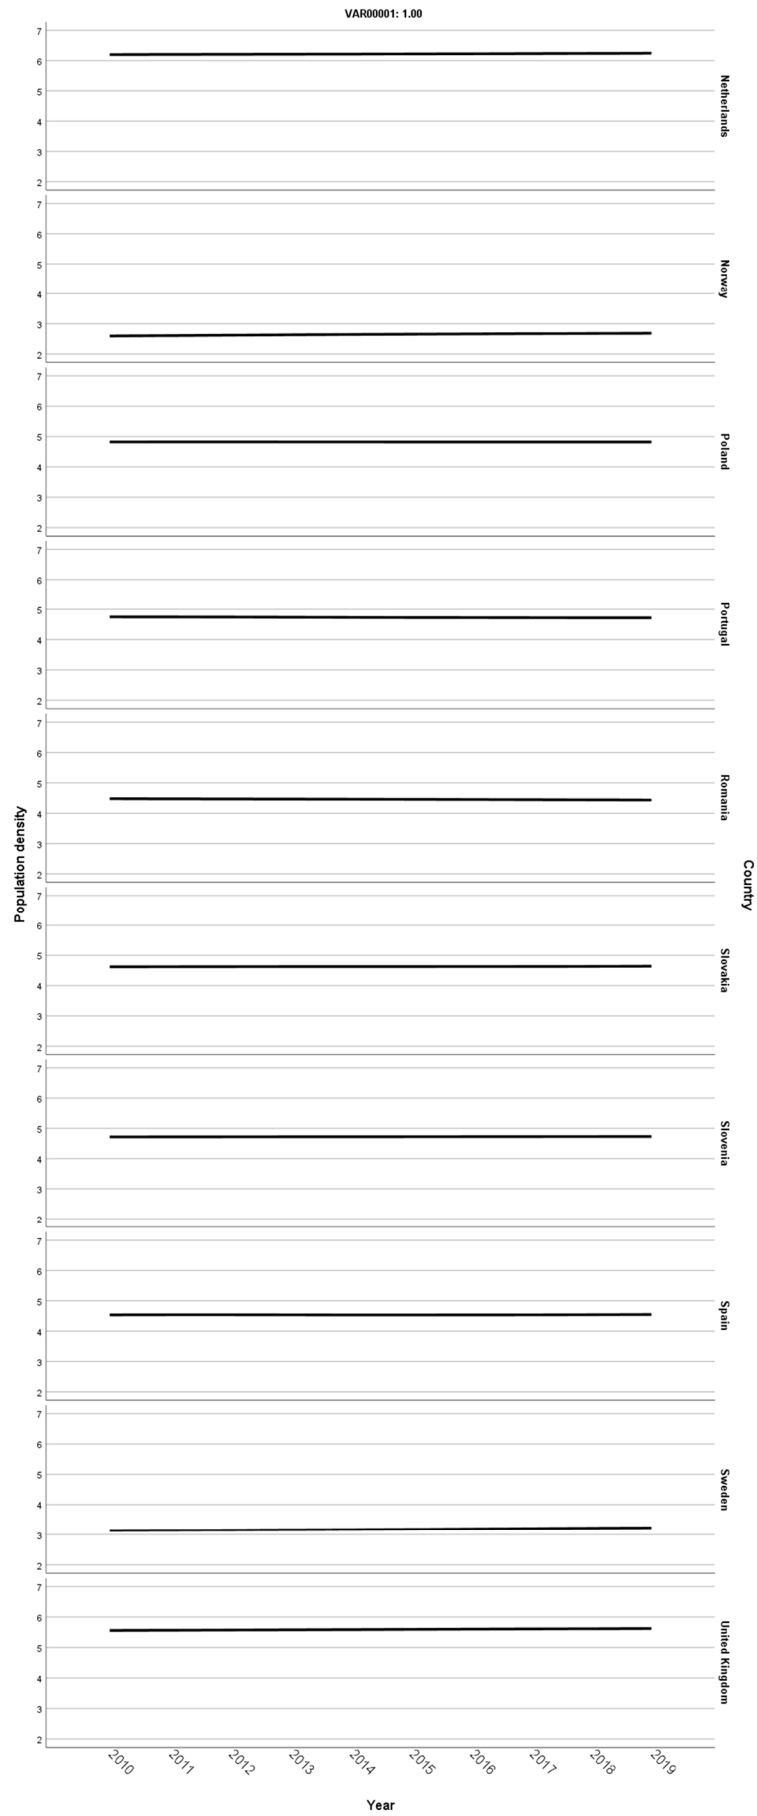

**Figure S6.** Association of antimicrobial resistance (normalized) with antibiotic consumption (A) and population density (B). Unadjusted weighted linear trend lines are shown.

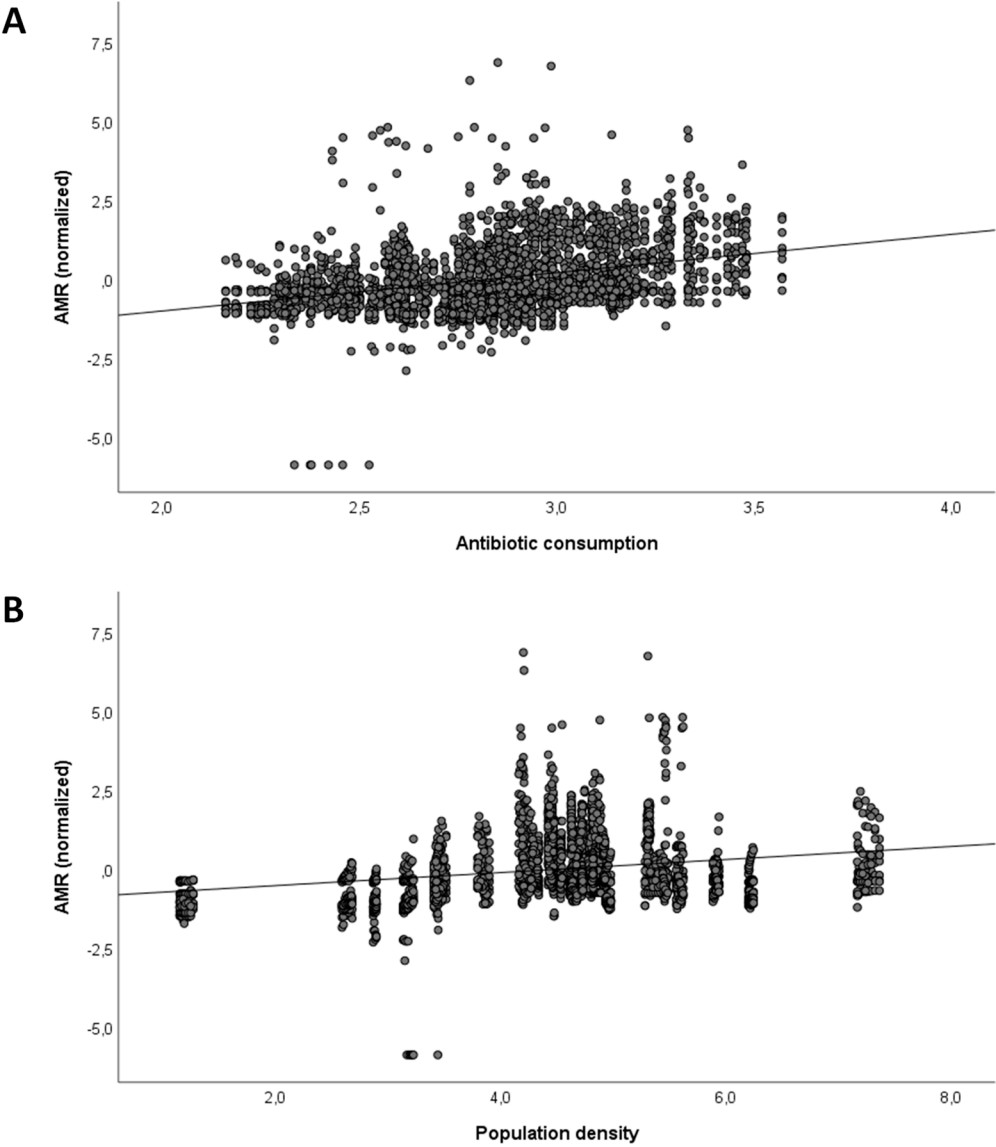

**Figure S7.** Trends in GDP per capita between 2010-2019 across 30 European countries.

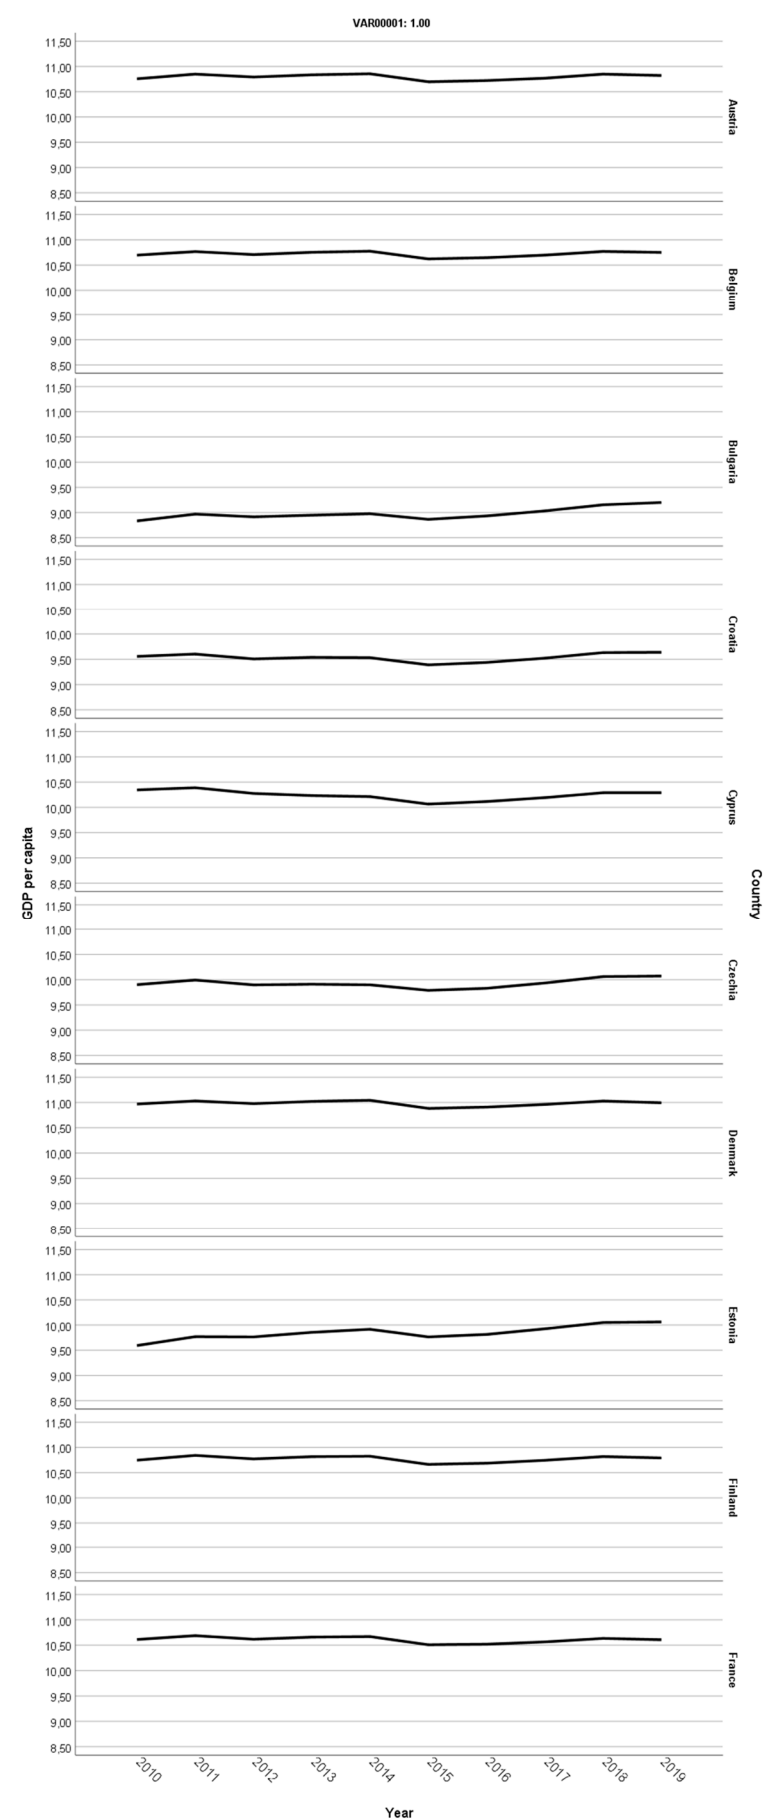

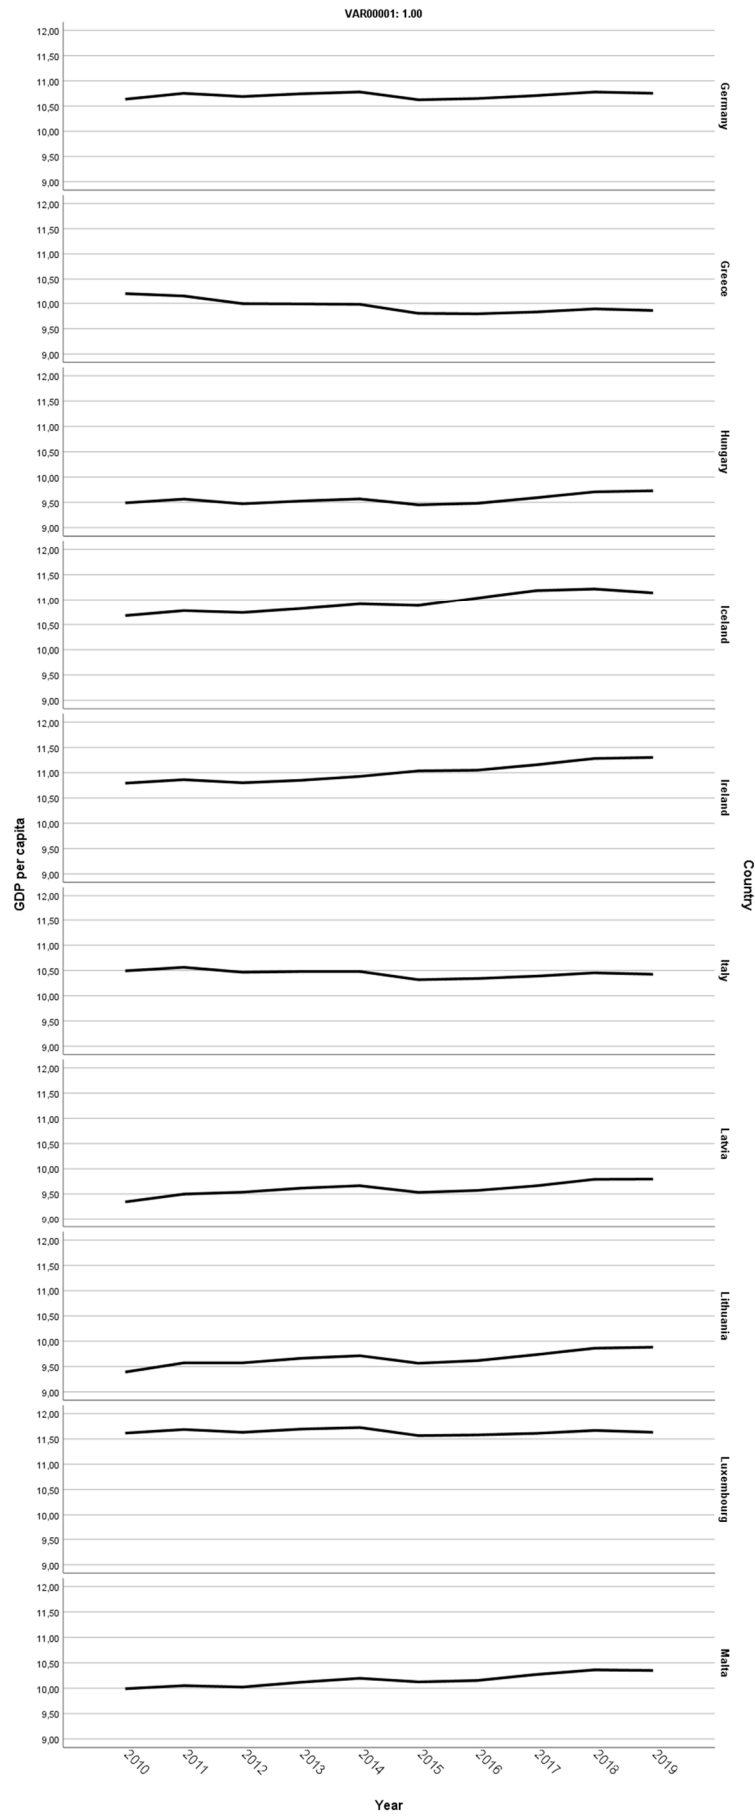

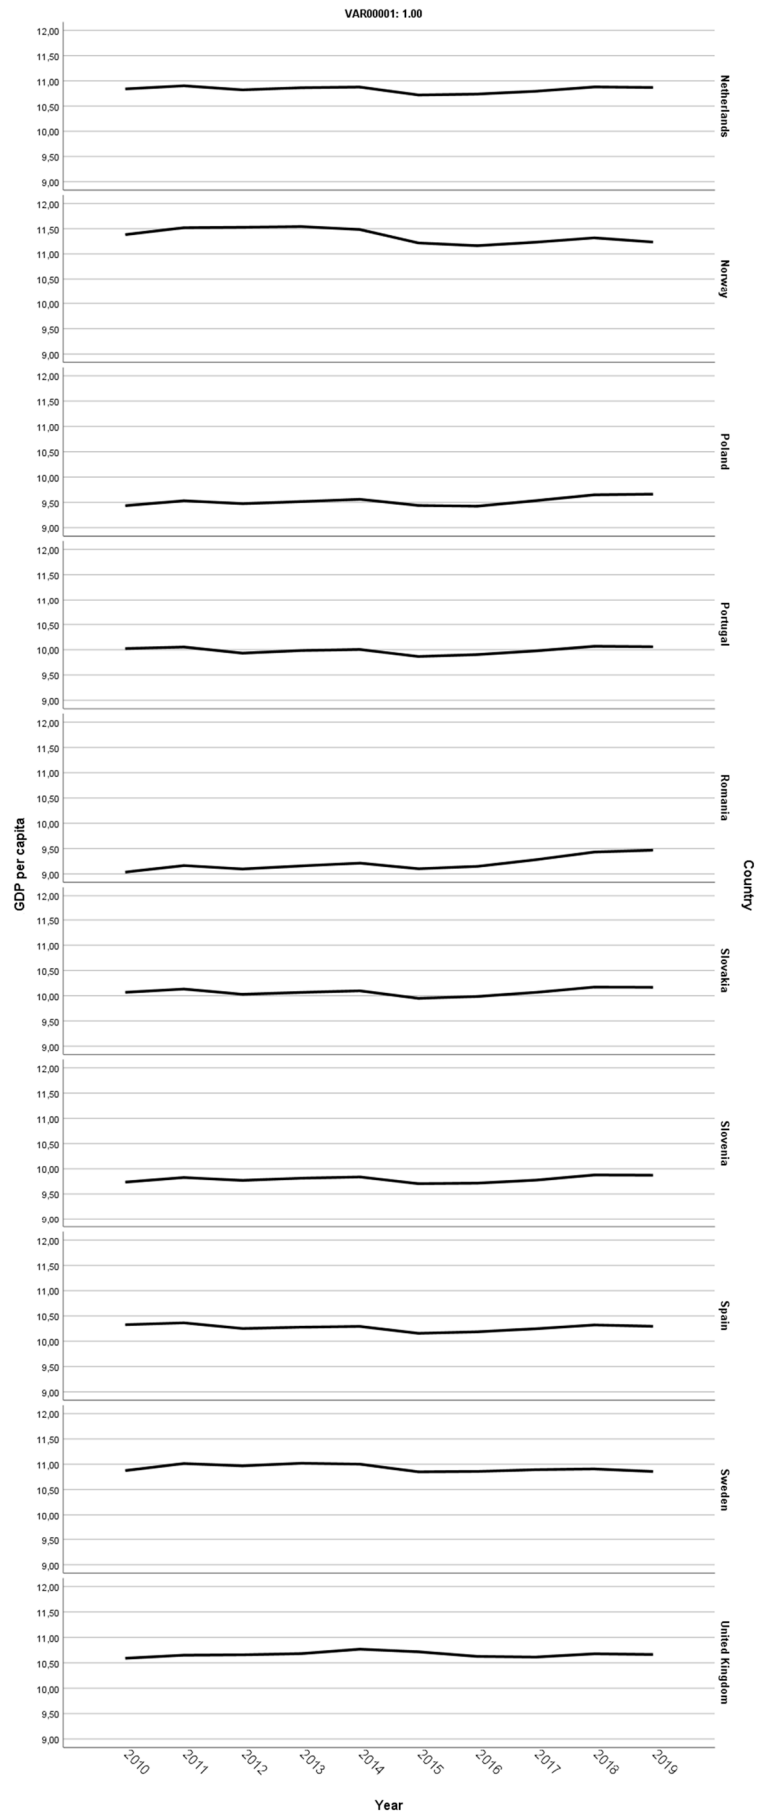

**Figure S8.** Trends in the governance index between 2010-2019 across 30 European countries.

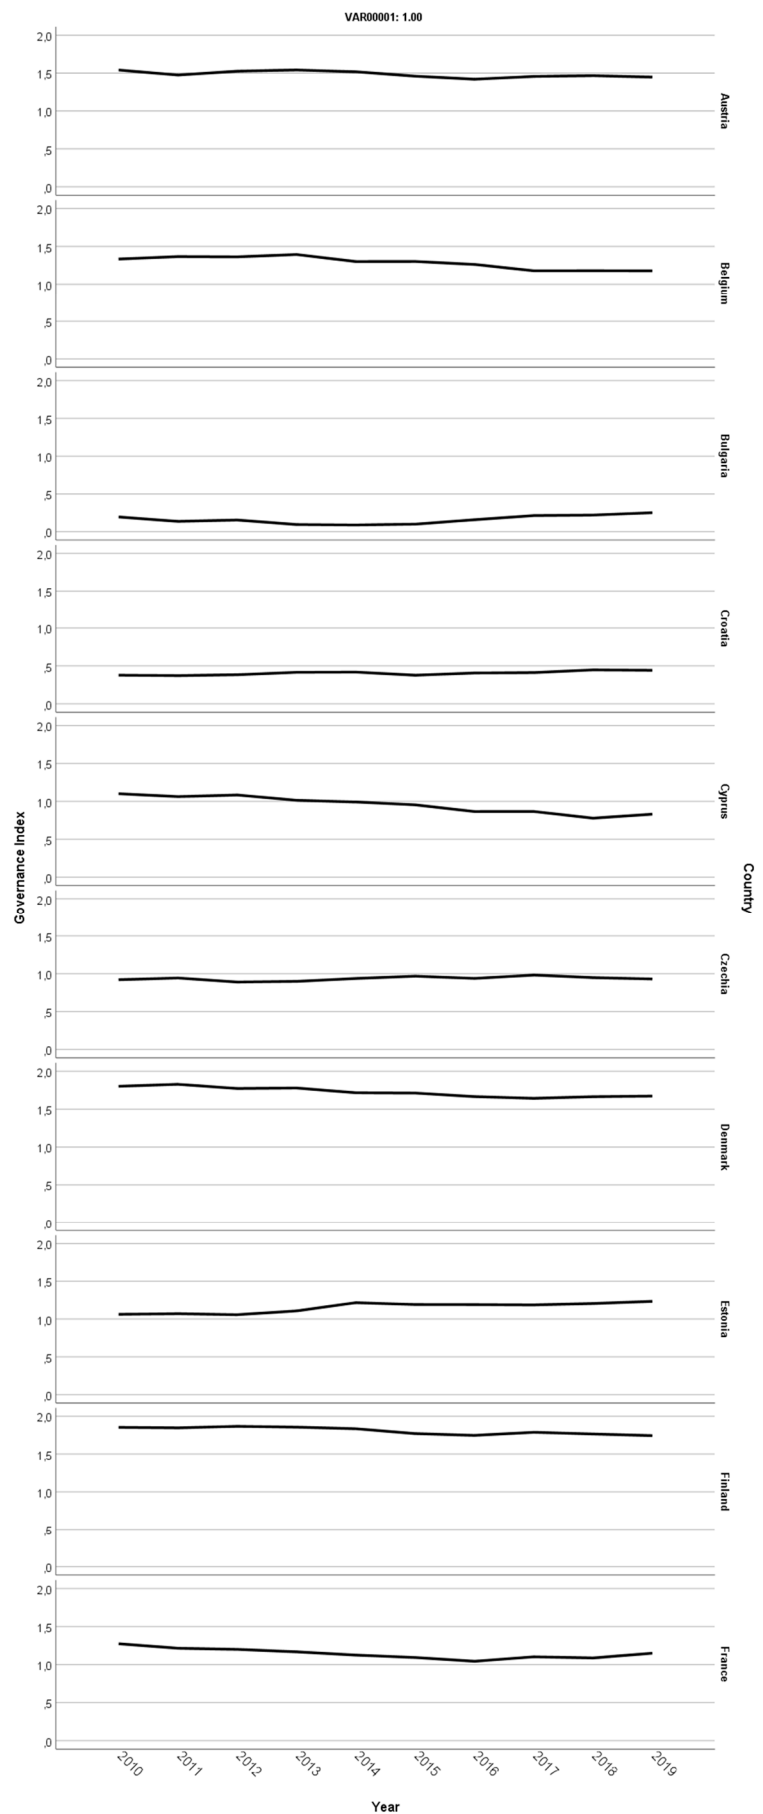

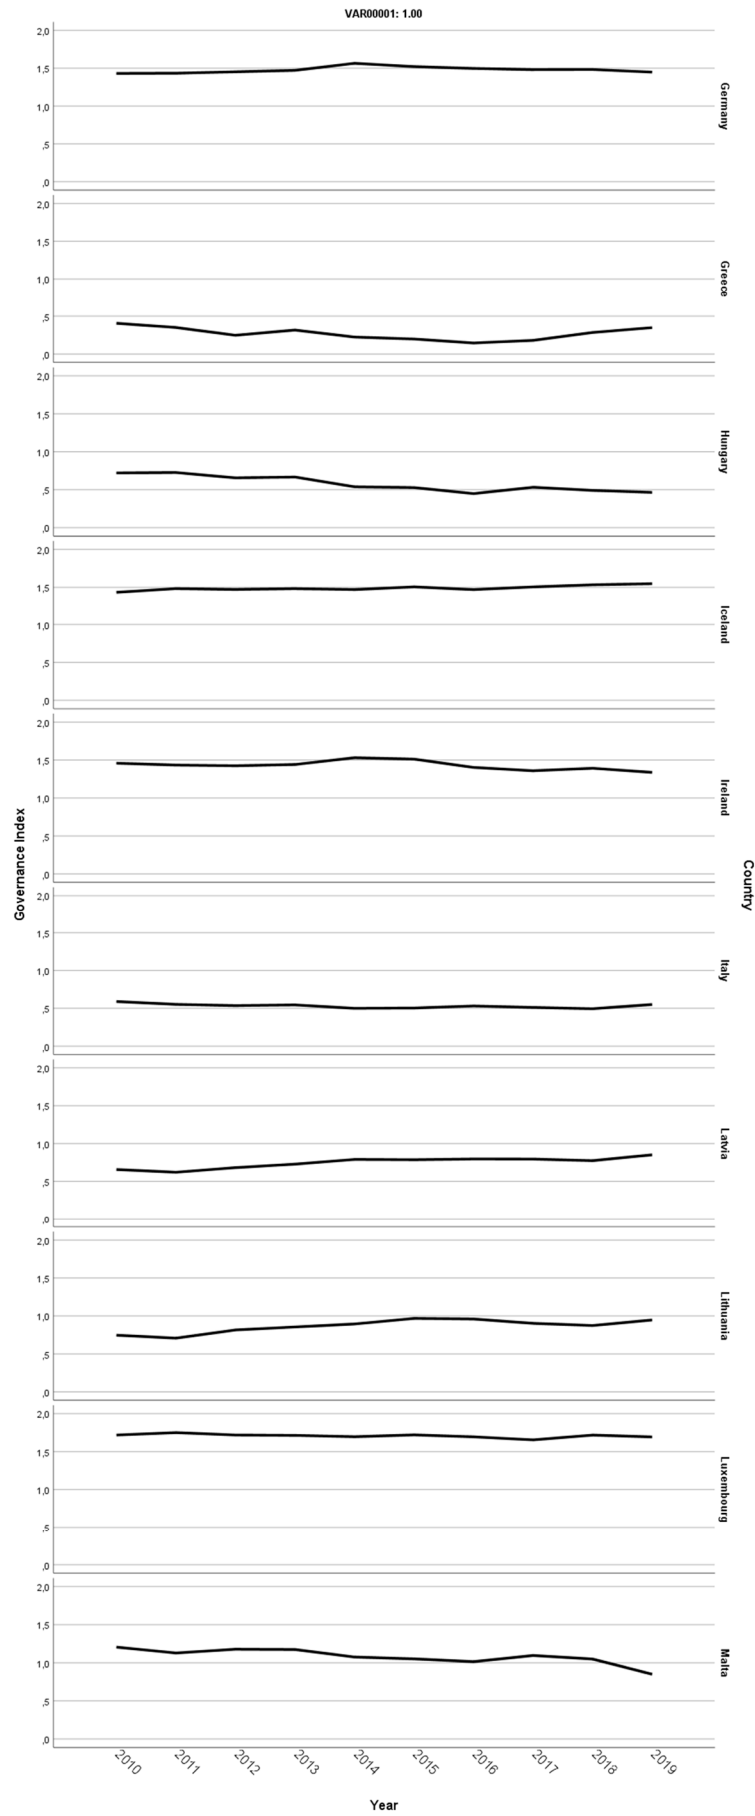

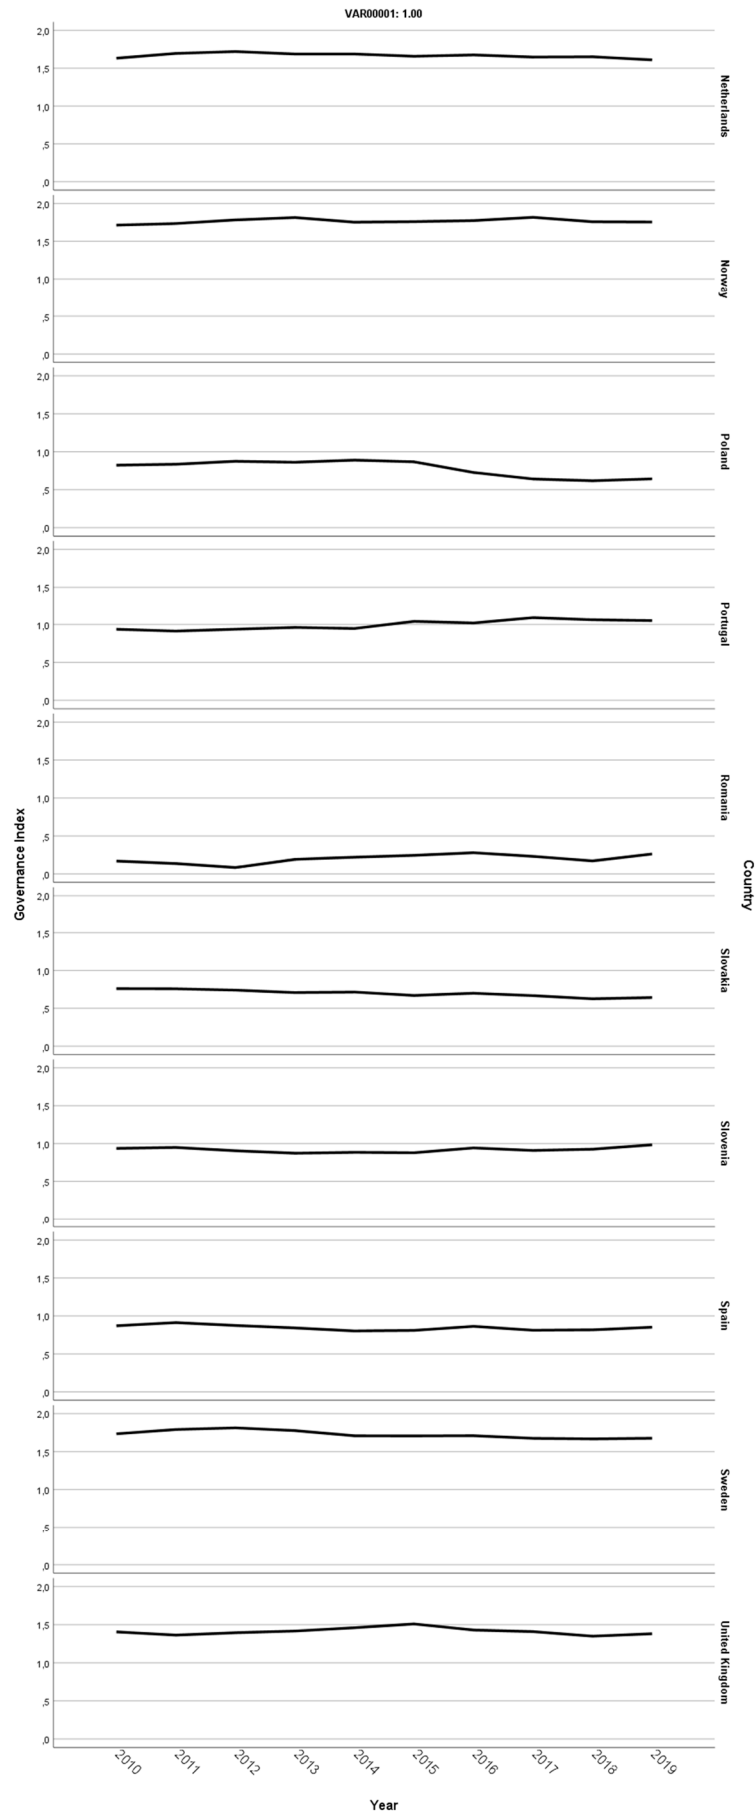

**Figure S9.** Association of antimicrobial resistance (normalized) with GDP per capita (A) and the governance index (B). Unadjusted weighted linear trend lines are shown.

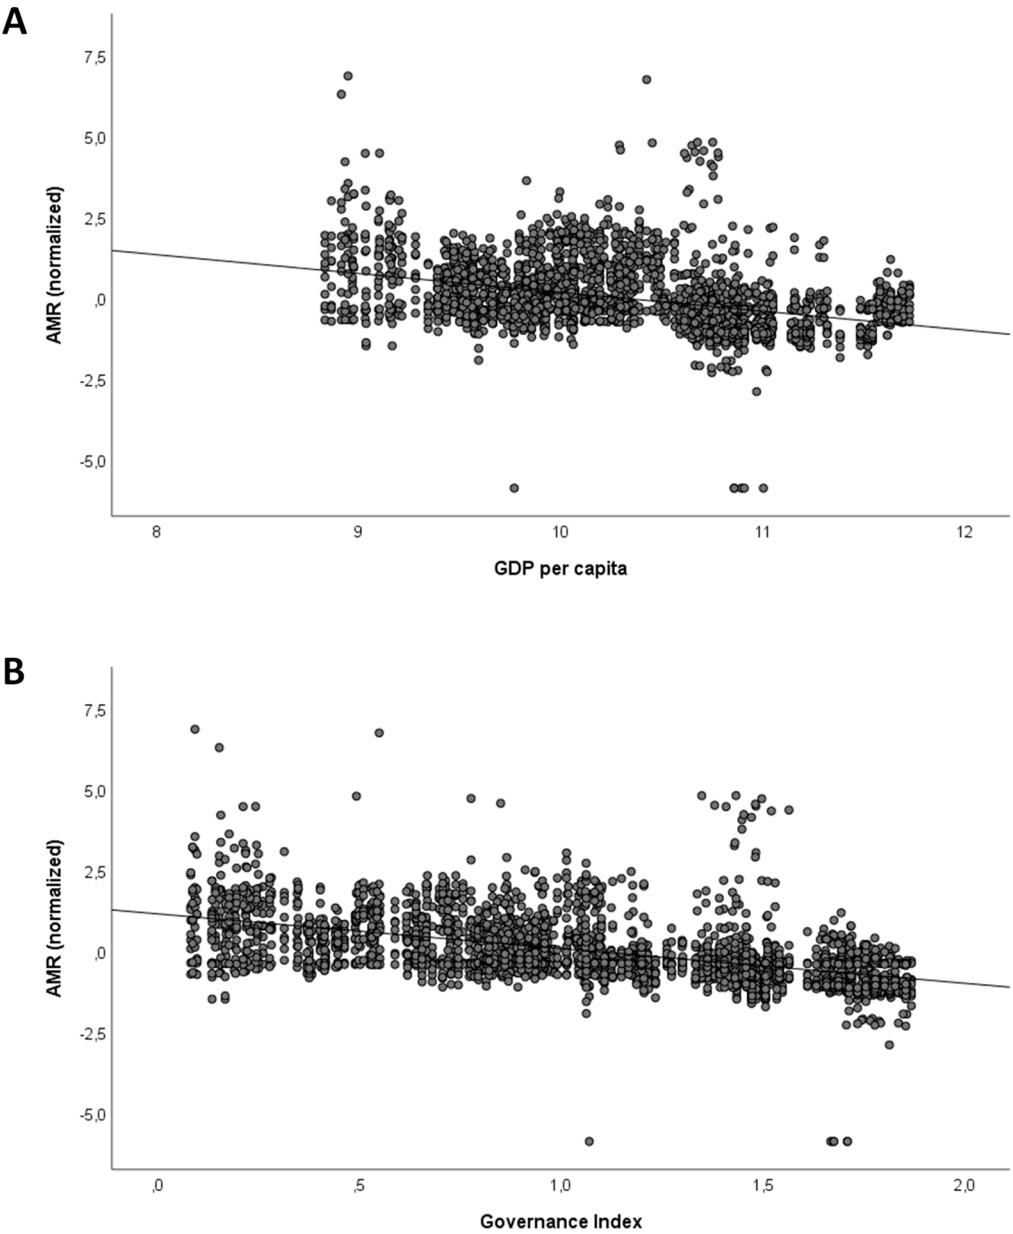

**Table S1. Unadjusted and adjusted multivariable analyses to evaluate the linear relationship of antimicrobial resistance with temperature change and other predictors**

| Linear regression model                                             | Coefficient<br>(95% confidence interval) |
|---------------------------------------------------------------------|------------------------------------------|
| <b>Unadjusted</b>                                                   |                                          |
| Mean annual temperature change (°C)                                 | 0.042 (-0.016; 0.101)                    |
| <b>Adjusted Model 1<sup>a</sup></b>                                 |                                          |
| Mean annual temperature change (°C)                                 | 0.140 (0.039; 0.241)**                   |
| Year                                                                | 0.032 (-0.001; 0.065)                    |
| Interaction                                                         | -0.010 (-0.030; 0.010)                   |
| Antibiotic consumption in the community (DDD/1,000 inhabitants/day) | 1.163 (1.044; 1.282)***                  |
| Population density (persons/km <sup>2</sup> )                       | 0.165 (0.135; 0.196)***                  |
| <b>Adjusted Model 2<sup>b</sup></b>                                 |                                          |
| Mean annual temperature change (°C)                                 | 0.027 (-0.064; 0.118)                    |
| Year                                                                | 0.051 (0.022; 0.081)**                   |
| Interaction                                                         | -0.017 (-0.035; 0.001)                   |
| Antibiotic consumption in the community (DDD/1,000 inhabitants/day) | 0.506 (0.366; 0.646)***                  |
| Population density (persons/km <sup>2</sup> )                       | 0.143 (0.116; 0.170)***                  |
| GDP per capita (current US\$)                                       | 0.093 (-0.022; 0.209)                    |
| Governance Index                                                    | -1.043 (-1.207; -0.879)***               |

Abbreviations: DDD, defined daily dose; GDP, gross domestic product.

For interpretability, year was zeroed at baseline (2010) and a natural log transform was applied to antibiotic consumption, GDP per capita, and population density to improve linear fit.

<sup>a</sup> Coefficients with 95% confidence intervals) were adjusted for country, mean annual temperature change, year, antibiotic consumption, population density, and the interaction between year and temperature change.

<sup>b</sup> Coefficients with 95% confidence intervals) were adjusted for country, mean annual temperature change, year, antibiotic consumption, population density, GDP per capita, governance index, and the interaction between year and temperature change.

\*\*\*  $p < 0.001$ ; \*\*  $p < 0.01$
